# Supplementary material for: Does non-stationarity induced by multiyear drought invalidate the paired-catchment method?
Source: Copernicus journal article supplement (doi:10.5194/hess-26-6379-2022), 2022-12-20
Supplement: Supplementary file 1 [file hess-26-6379-2022-supplement.pdf]

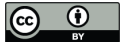

*Supplement of*

## **Does non-stationarity induced by multiyear drought invalidate the paired-catchment method?**

**Yunfan Zhang et al.**

*Correspondence to:* Lei Cheng (lei.cheng@whu.edu.cn)

The copyright of individual parts of the supplement might differ from the article licence.

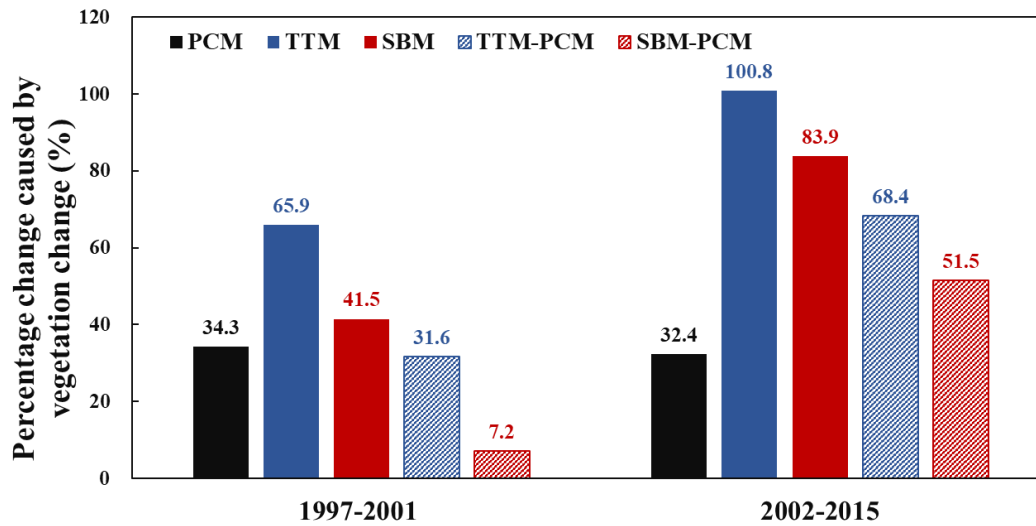

Figure S1: The contribution of vegetation changes to the total runoff changes of the Red Hill catchment estimated traditionally using all three methods during the periods of 1997–2001 and 2002–2015.
